# Supplementary material
Source: PubMed Central journal article supplement (PMC10802846)

# <sup>1</sup>H NMR spectrum of compound 21

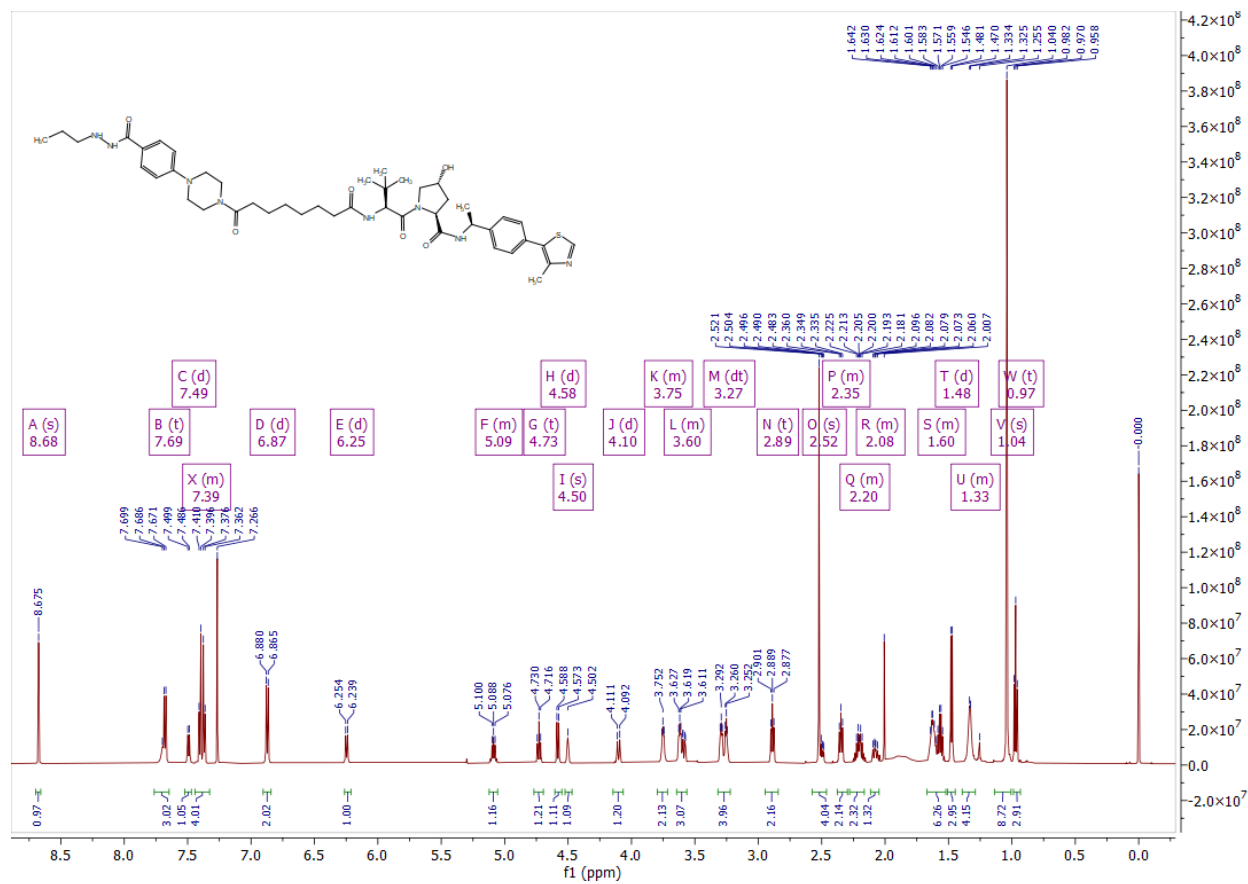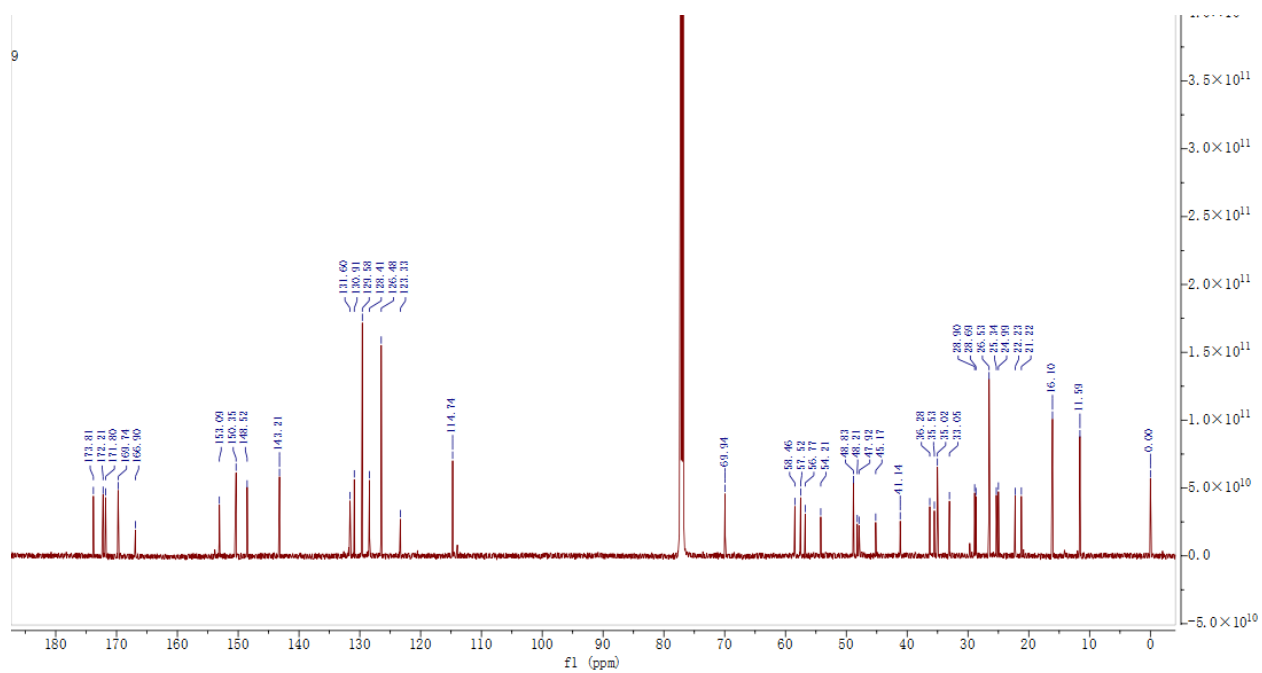

# <sup>1</sup>H NMR spectrum of compound 22

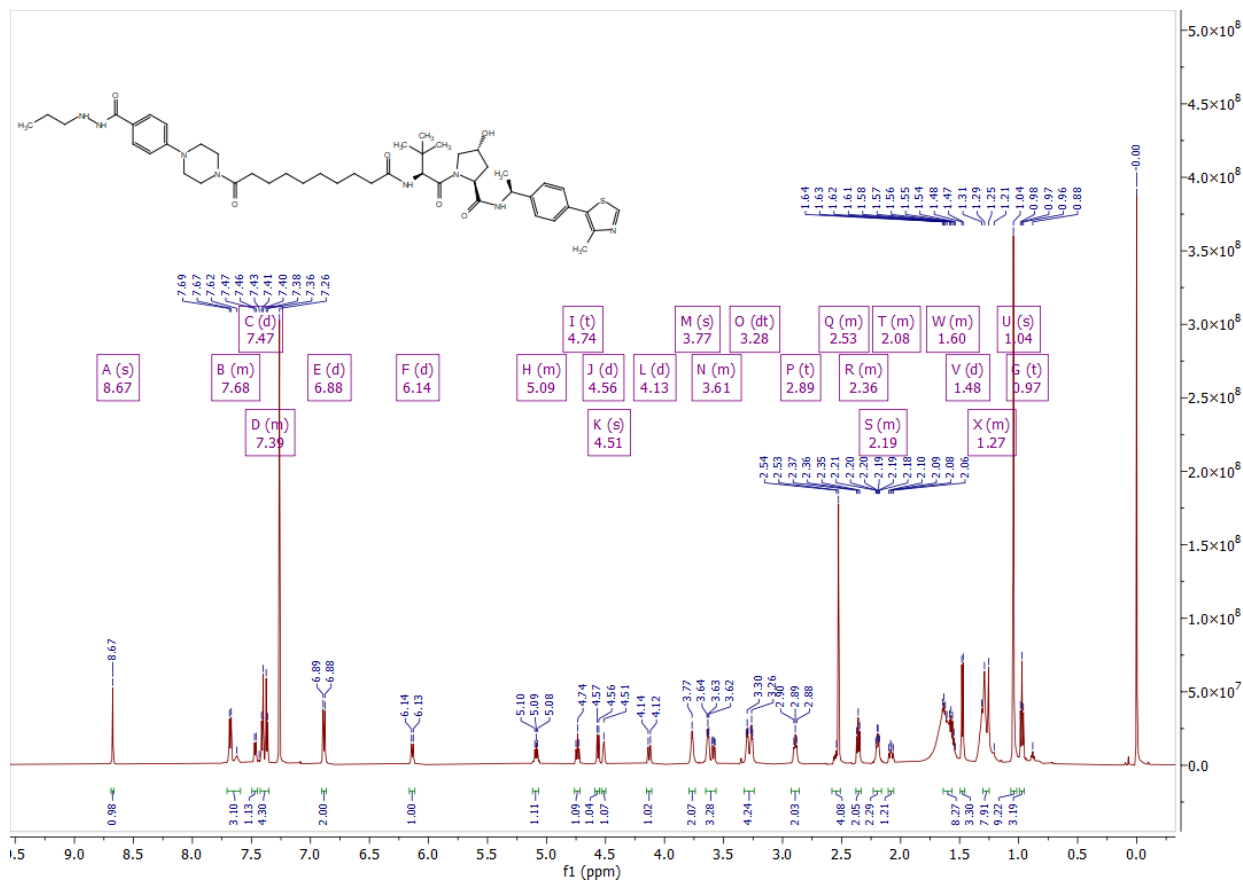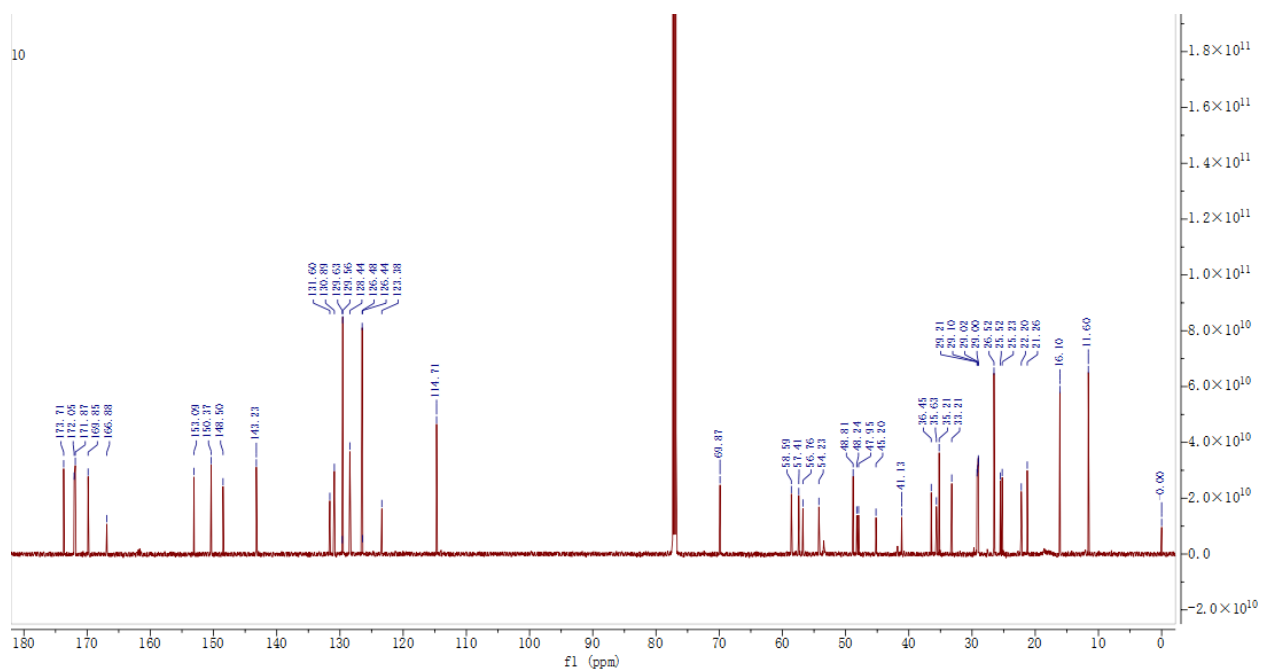

<sup>1</sup>H NMR spectrum of compound 23

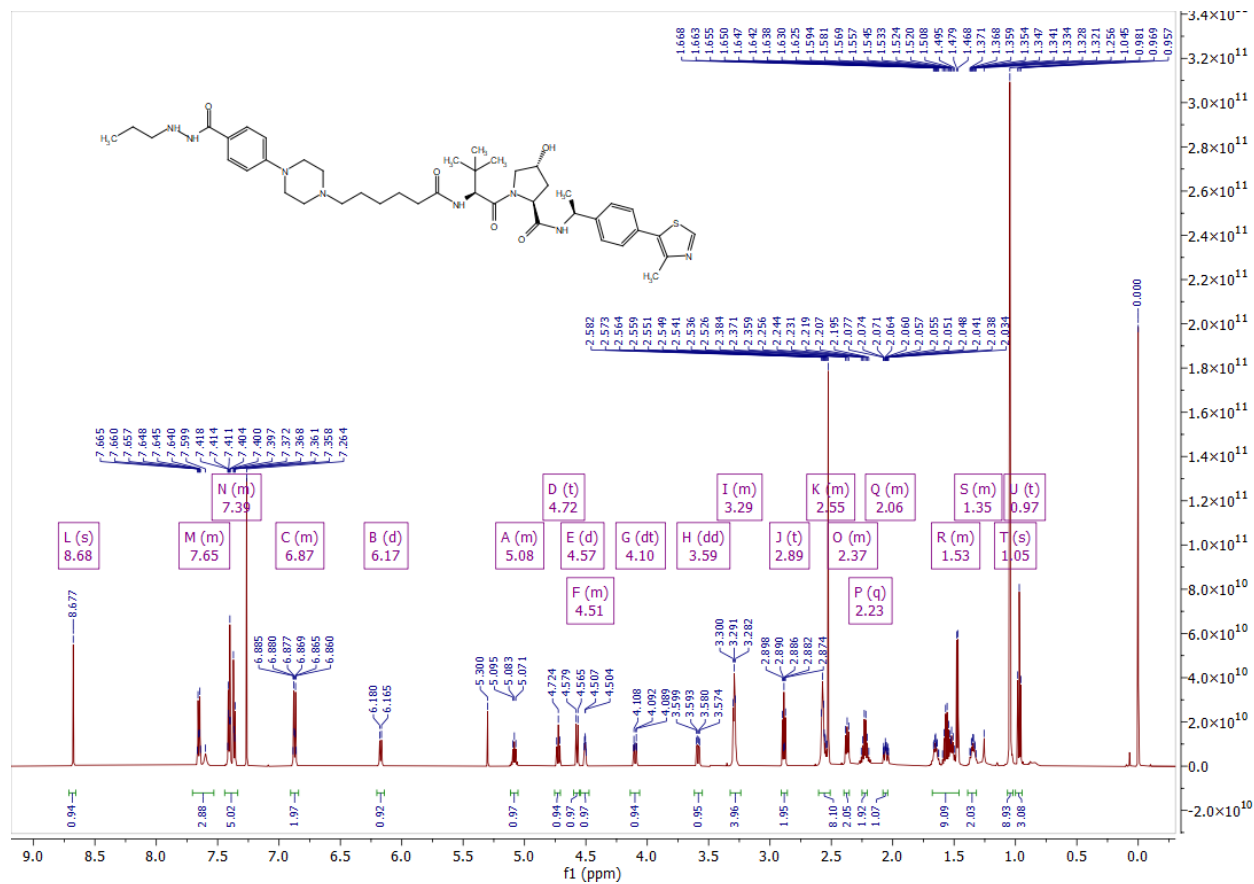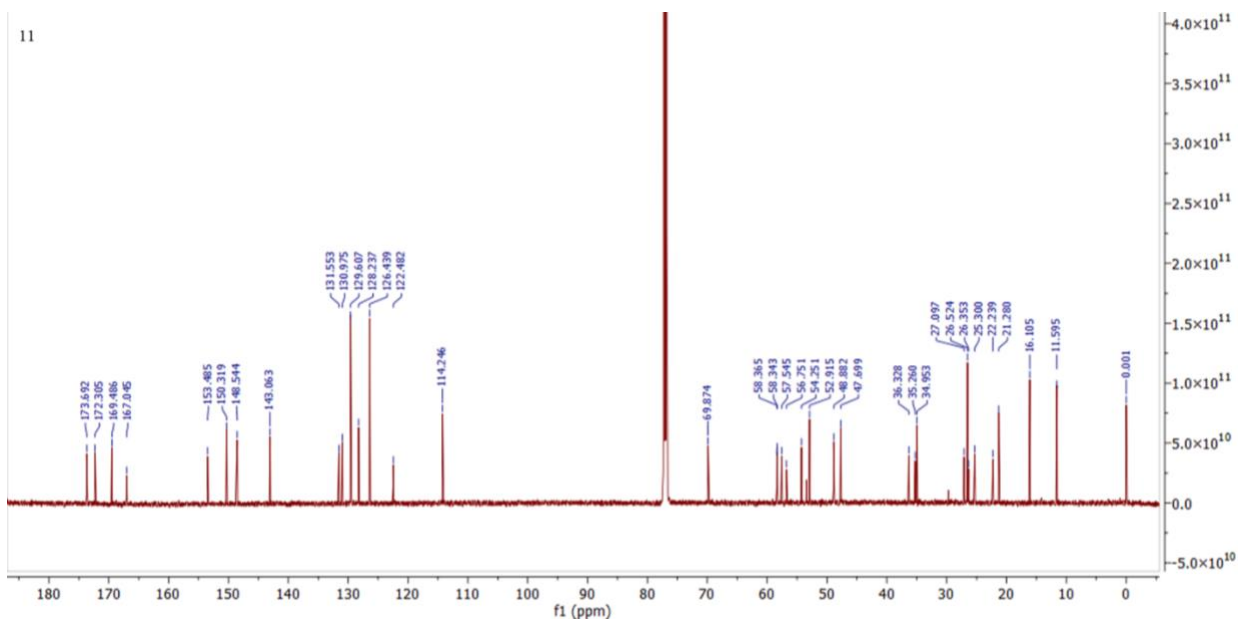

<sup>1</sup>H NMR spectrum of compound 24

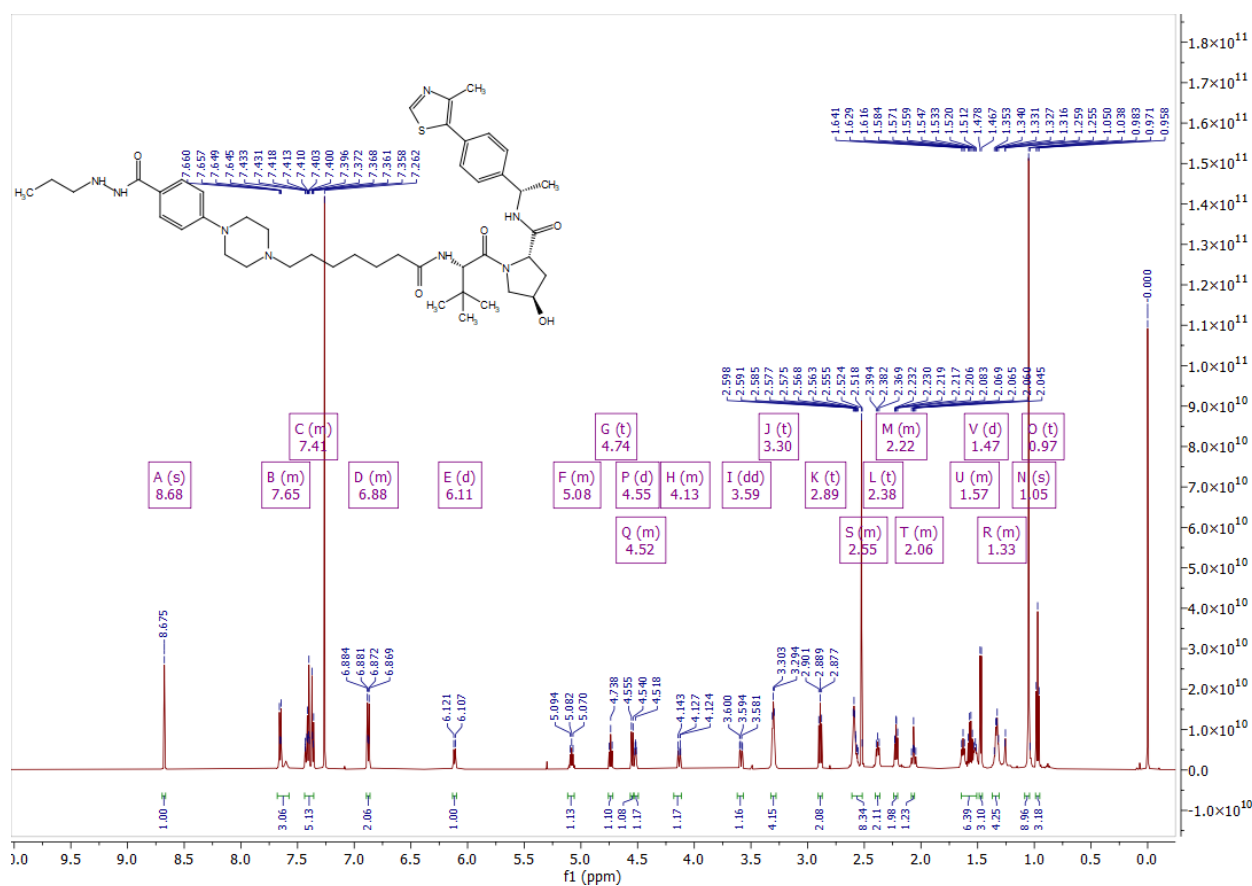

12

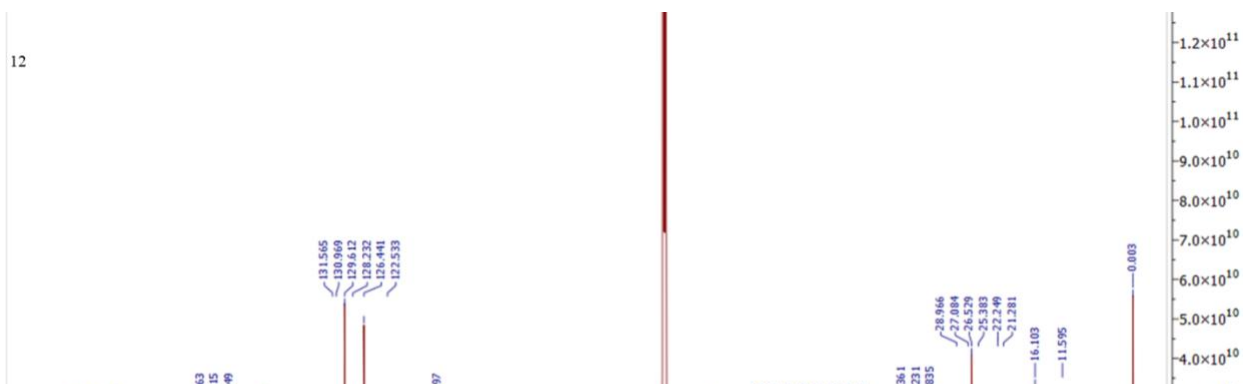

<sup>1</sup>H NMR spectrum of compound 25 (YX968)

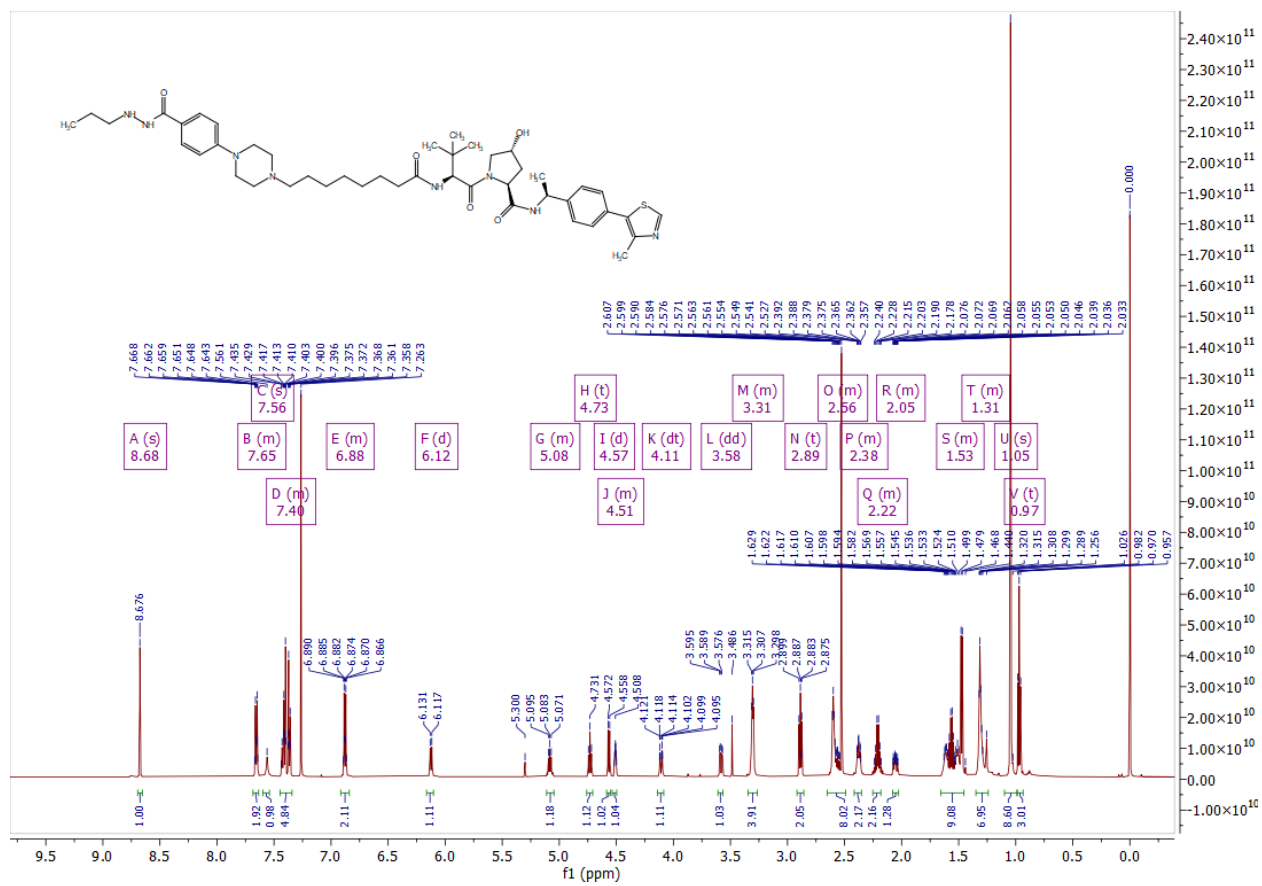

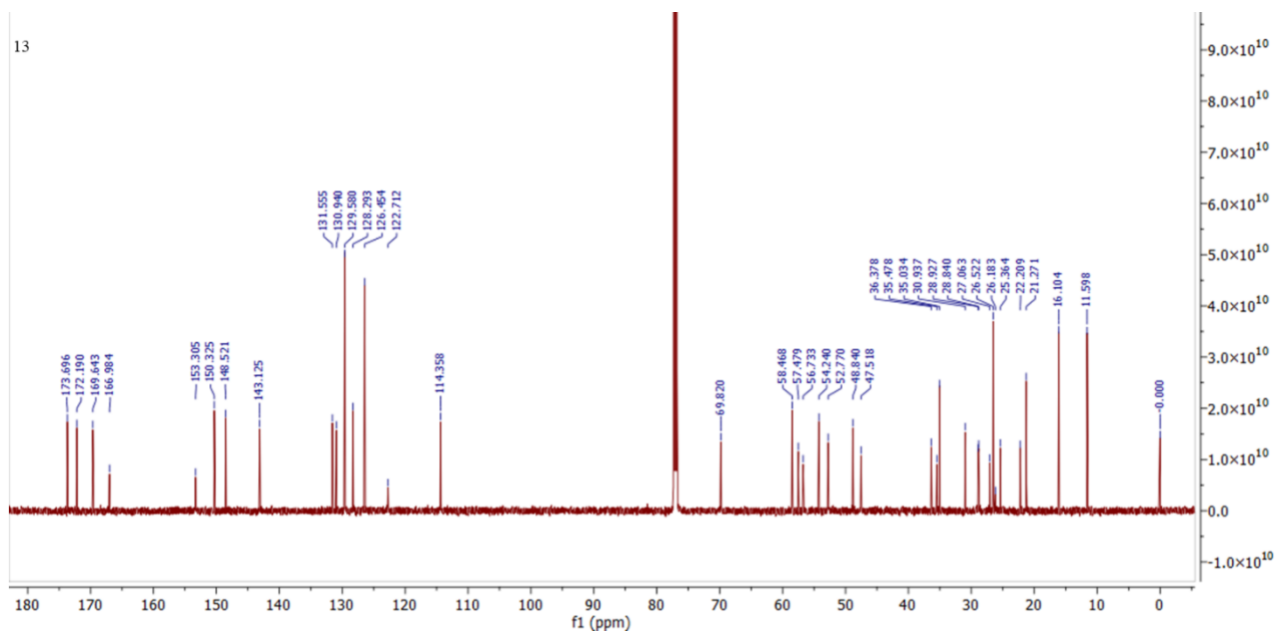

$^1\text{H}$  NMR and  $^{13}\text{C}$  NMR spectrum of YX968-NC

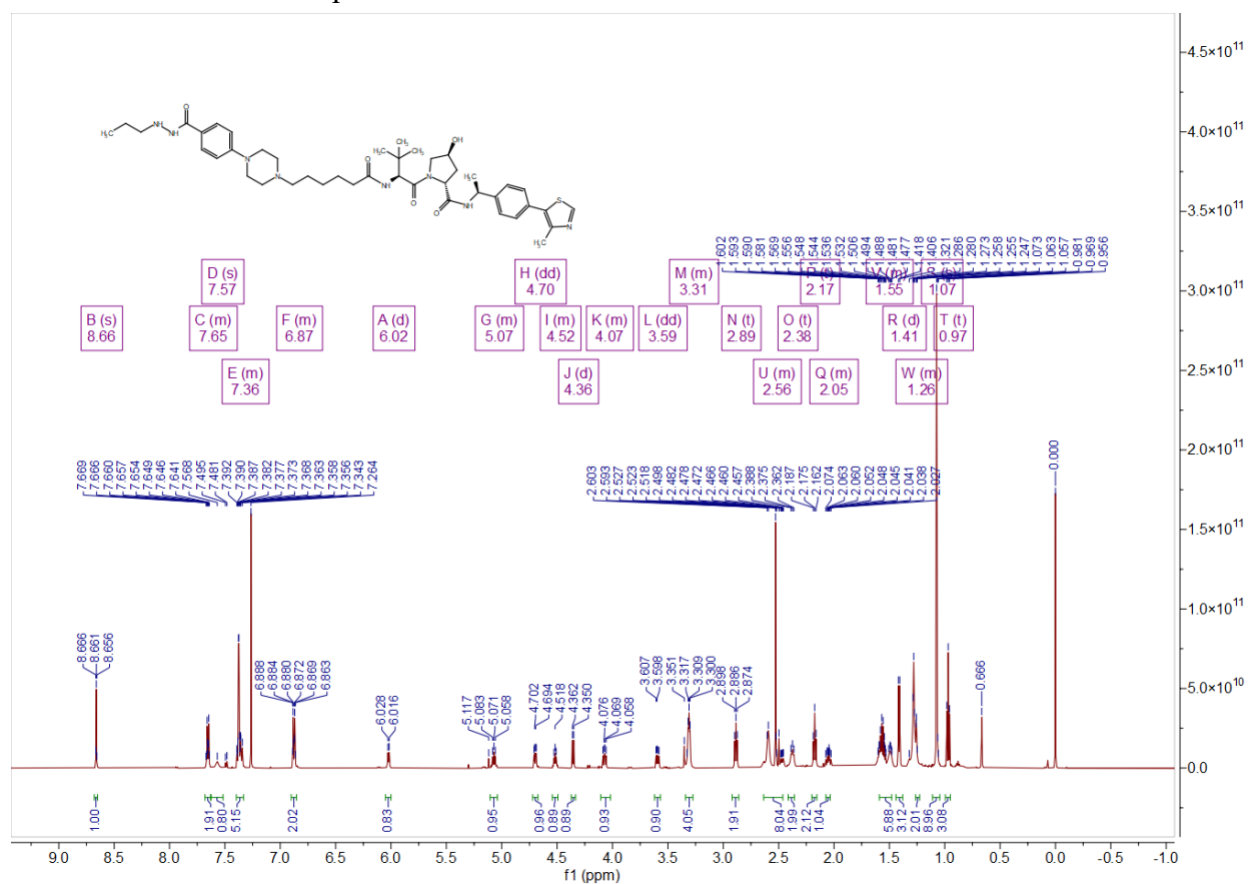

<sup>1</sup>H NMR spectrum of compound 26

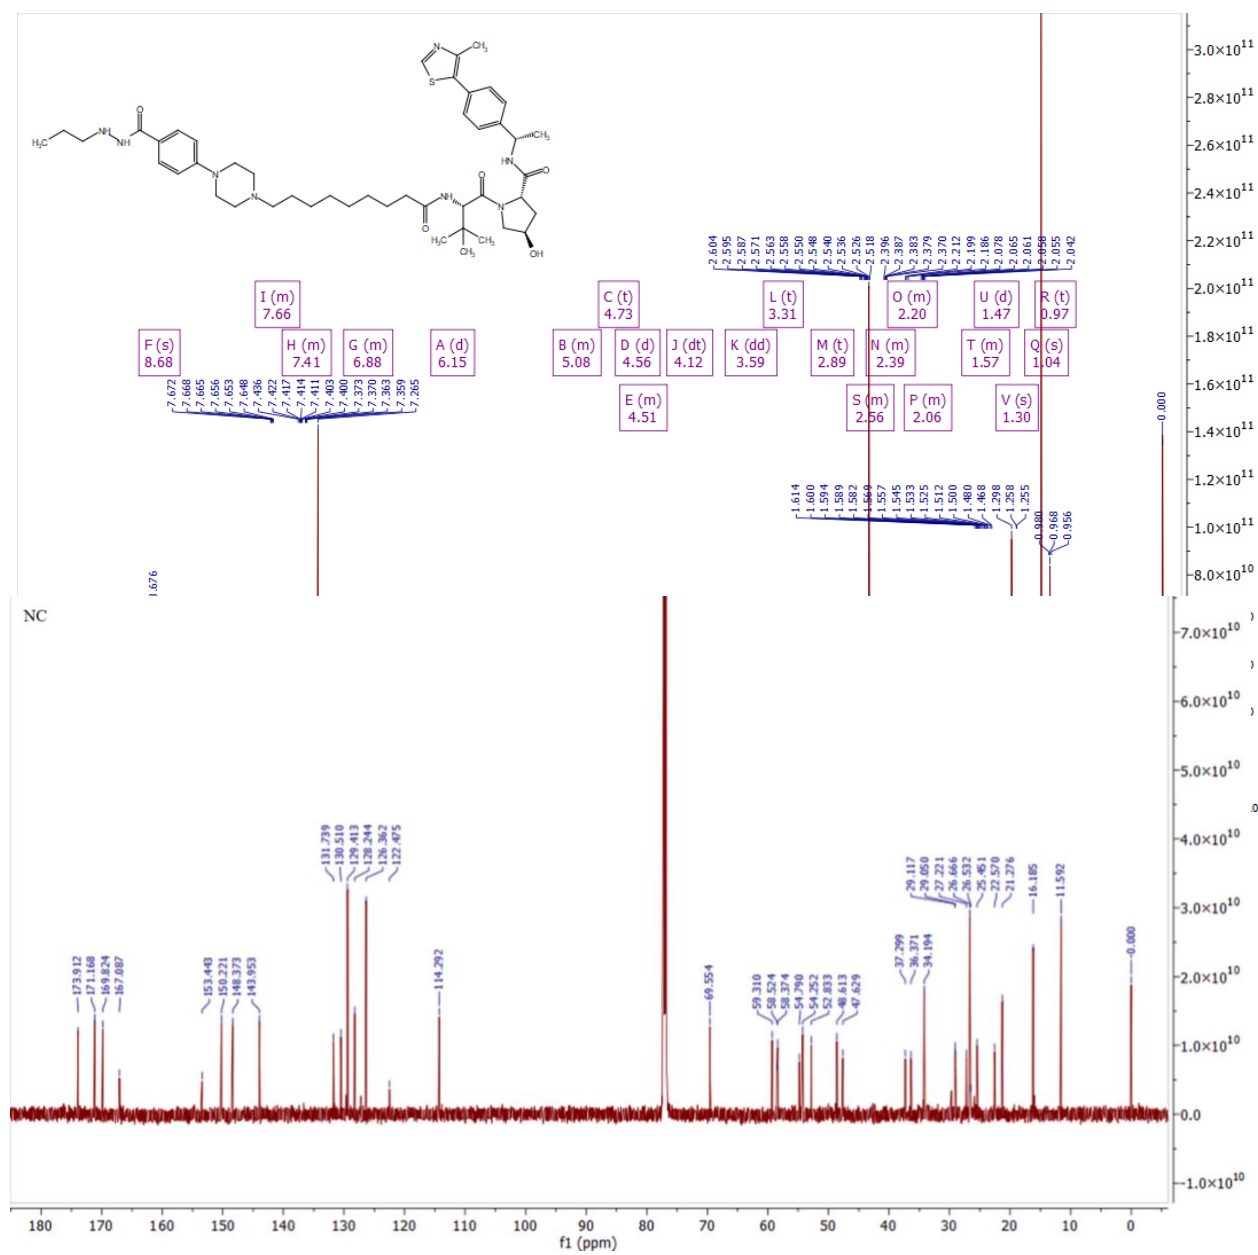



14

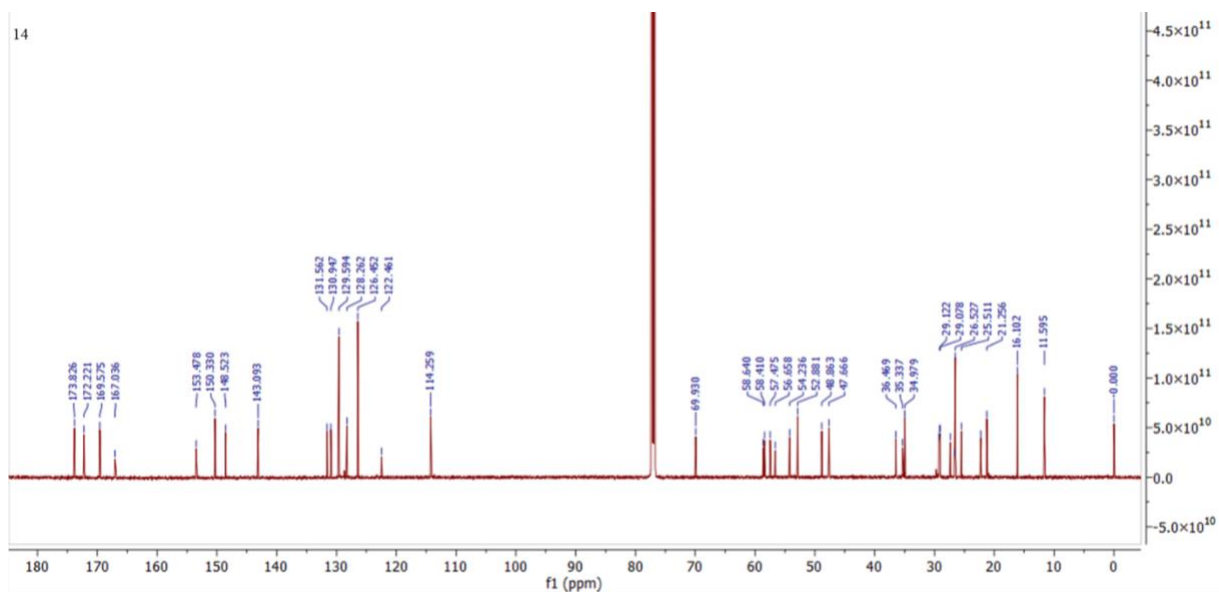<sup>1</sup>H NMR spectrum of compound 27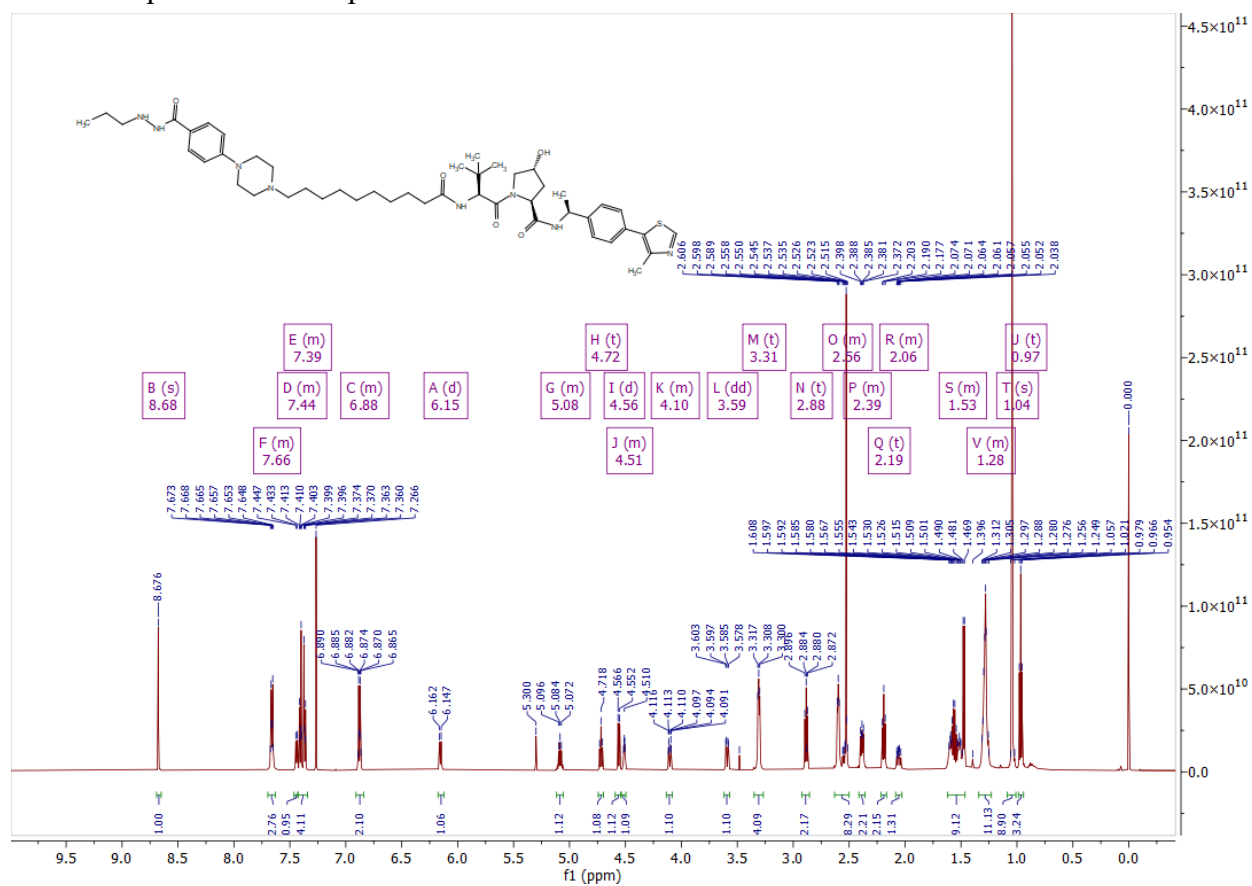

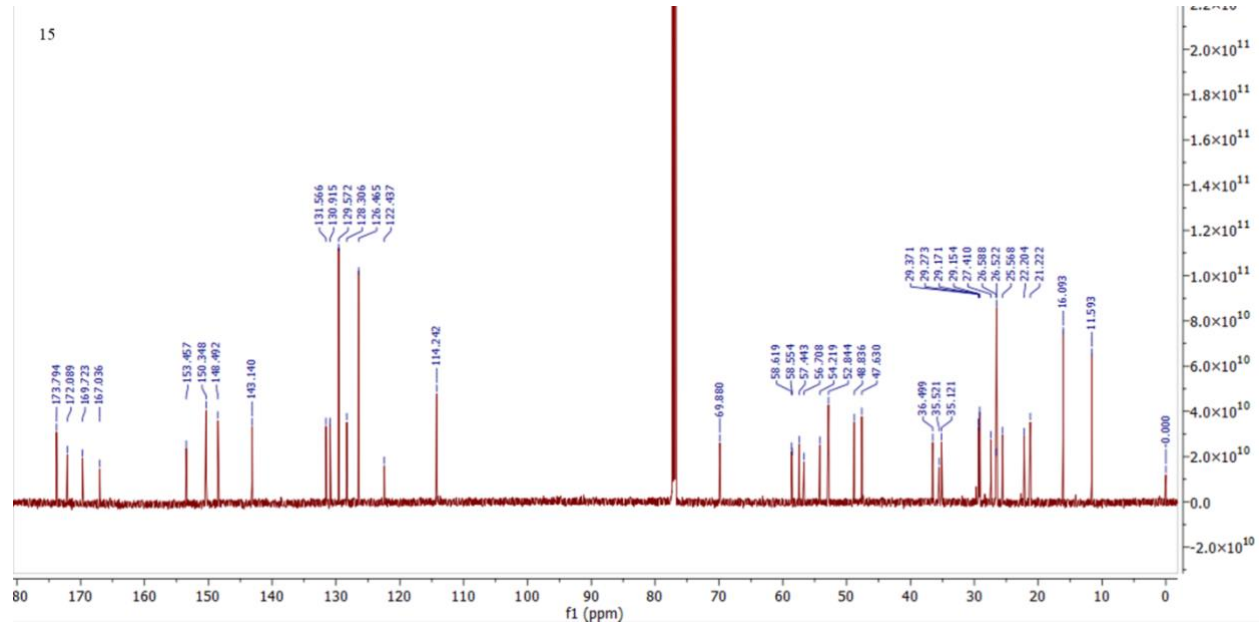

Supplement: NIHMS1944382-supplement-Data_S3.pdf [file NIHMS1944382-supplement-Data_S3.pdf]
